# Supplementary material
Source: PubMed Central journal article supplement (PMC5100772)
Supplement: supp_pp.16.00985_PP2015-01383DR2_Supplemental_Figure_S6.pdf [file supp_pp.16.00985_PP2015-01383DR2_Supplemental_Figure_S6.pdf]

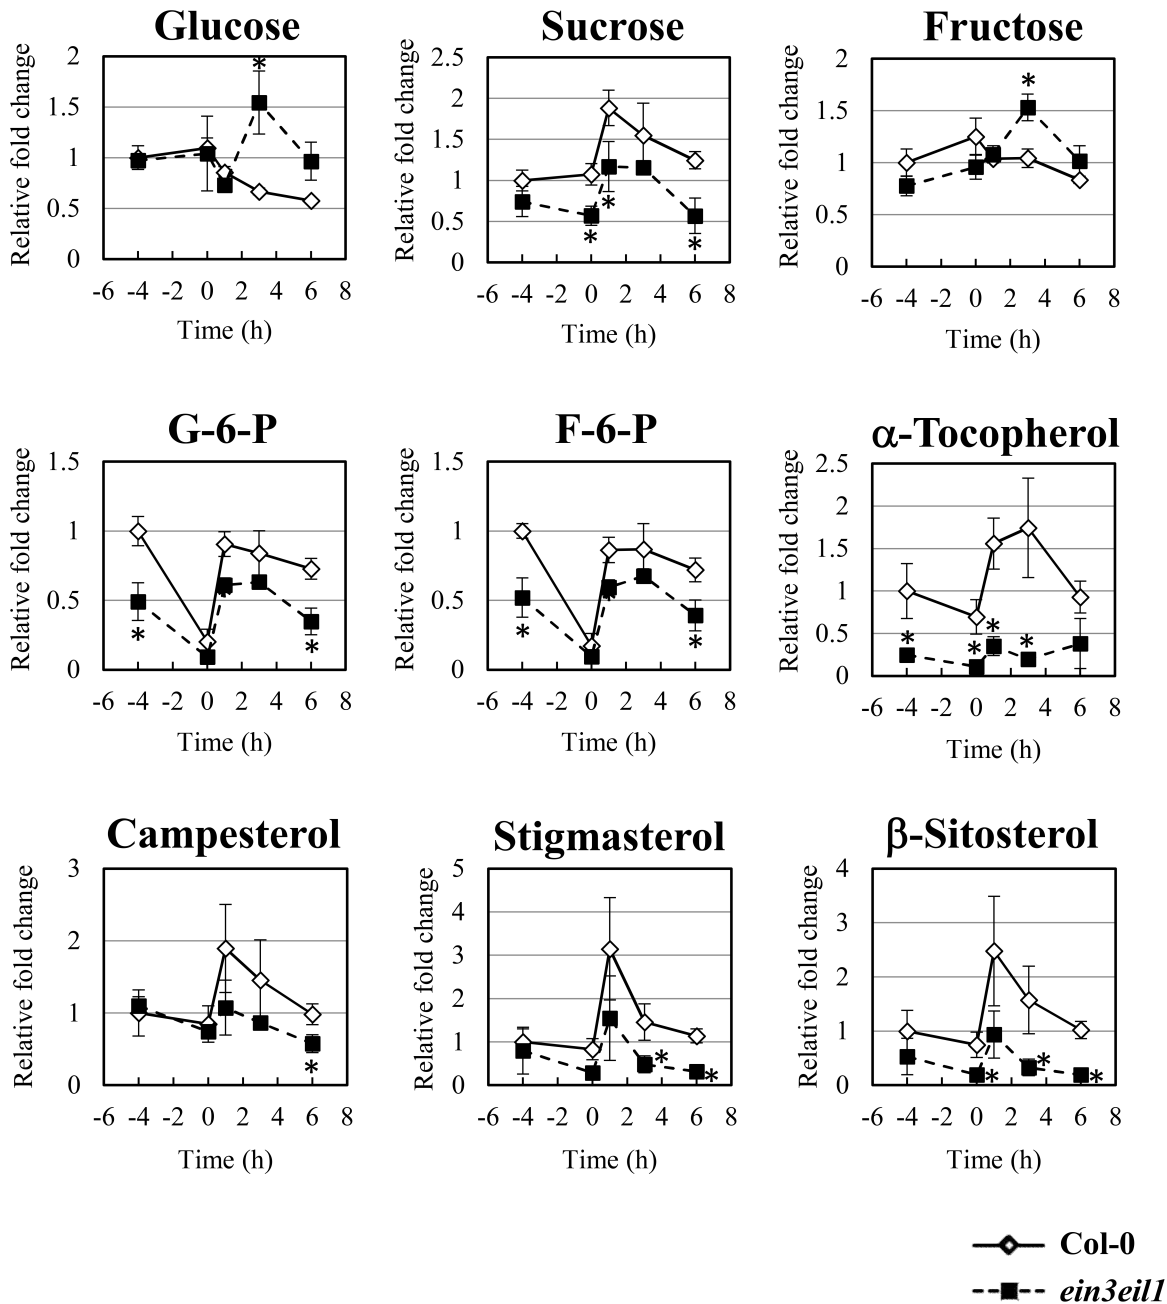

**Supplemental Figure S6.** Changes of carbohydrates,  $\alpha$ -tocopherol and phytosterols in wild-type and *ein3eil1* in response to A/R

GC-TOFMS was applied to investigate carbohydrates,  $\alpha$ -tocopherol and phytosterols during anoxia and reoxygenation. The black line with diamond symbols corresponds to the wild-type, and the dotted line with square symbols corresponds to the *ein3eil1* mutant. The x-axis is the treatment time course. The time point of -4 corresponds to normoxia and the zero point is set as the beginning of reoxygenation. The time points of 1, 3, and 6 represent 1 h, 3 h, and 6 h of reoxygenation respectively. The level of metabolites is expressed by relative fold change that is calculated by normalizing values of the wild-type (Nor). The results presented are the mean values of at least 4 biological replicates with SE. Asterisks (\*) indicate a student *t* test  $P < 0.05$ . G-6-P = glucose-6-phosphate and F-6-P = fructose-6-phosphate. Campesterol, stigmasterol, and sitosterol are common sterols in plants.
